# Supplementary material
Source: PubMed Central journal article supplement (PMC4111144)
Supplement: NIHMS603242-supplement-1.pdf [file NIHMS603242-supplement-1.pdf]

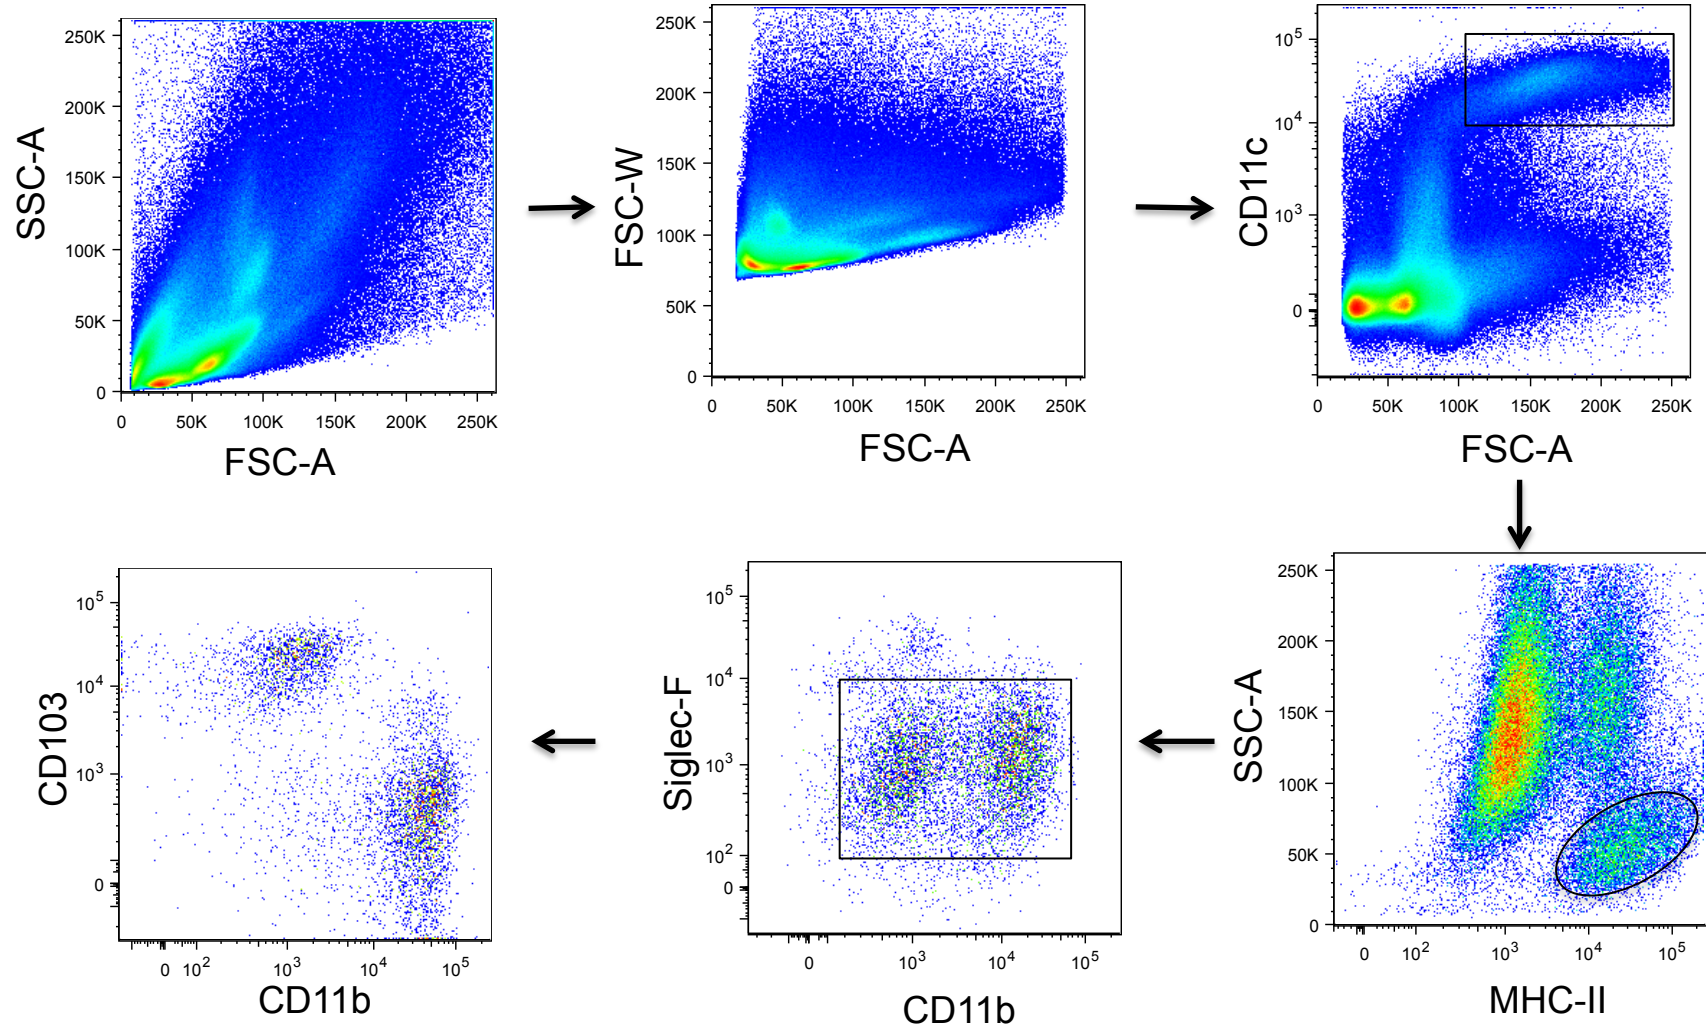

**Suppl. Figure 1. Gating strategy respiratory DCs.** DCs in the lungs were gated as CD11c<sup>+</sup> MHC class II<sup>hi</sup> SiglecF<sup>-</sup> on the low side scatter as shown above. Cells were acquired in a FACS Canto II instrument.

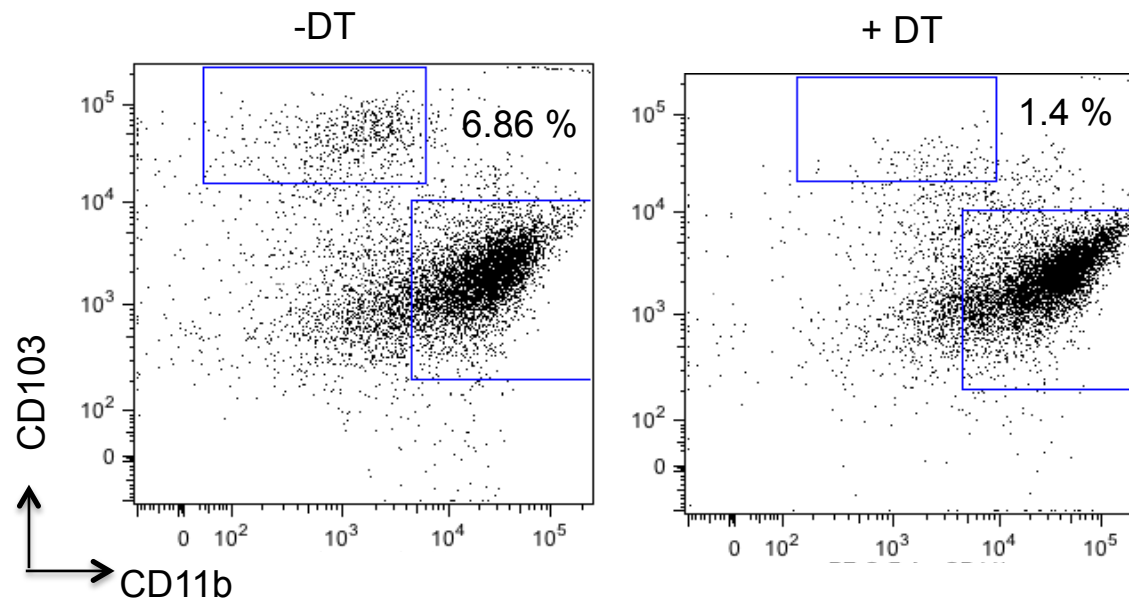

**Suppl. Figure 2. Efficiency of the depletion of Langerin<sup>+</sup> cells in the lung.** Fifty ng of DT was administered intranasally in 50 ml of PBS. Percentage of depletion is shown in CD11c<sup>+</sup> MHC class II<sup>hi</sup> CD103<sup>+</sup> cells in the lung at day 3 post treatment.
